# Supplementary material for: Textural Effects on Perceived Satiation and Ad Libitum Intake of Potato Chips in Males and Females
Source: Foods. 2020 Jan 13;9(1):85. doi: 10.3390/foods9010085 (PMC7022925; doi:10.3390/foods9010085)
Supplement: Supplementary File 1 [file foods-09-00085-s001.xlsx]

## Sheet: Datasets_submit_to_Foods_Journa
I.D	Gender	BMI	Age	PEFconsumed (g)	Liking_PEF	CrunchinessPEF	CrispinessPEF	PEFsatiation	CTRLconsumed (g)	Liking_CTRL	CrunchinessCTRL	CrispinessCTRL	CTRLSatiation
9	Male	25.5	19	87.02	38	54	42	27	111.5	59	33	62	3
19	Male	19.7	23	68.09	96	82	118	111	74.85	122	132	136	97
22	Male	25.1	21	54.45	109	138	134	105	110.15	34	24	45	112
1	Male	24.2	19	205.9	122	120	102	108	299.76	144	91	90	72
20	Male	20.3	50	149.04	115	100	105	131	150.54	64	52	49	12
26	Male	27.1	27	116.37	72	89	100	127	72.11	25	54	54	150
29	Male	27.7	24	100.75	95	104	29	125	95.02	57	82	116	120
30	Male	.	23	138.51	150	83	64	105	151.8	112	98	87	54
31	Male	33.4	23	150.72	126	75	75	121	212.71	113	76	62	84
33	Male	30.6	24	132.93	27	90	75	94	190.73	61	82	114	41
34	Male	25.9	24	152.99	78	61	69	72	94.45	150	136	144	60
36	Male	25.3	22	150.91	80	102	94	73	140.26	87	93	118	102
39	Male	35	23	148.04	75	111	75	83	142.36	76	122	82	48
41	Male	23.1	23	111.46	81	108	59	138	69.14	104	115	98	118
43	Male	27.1	23	150.58	102	54	99	101	218.44	88	97	147	50
47	Male	30.7	29	152.6	122	123	106	75	142.9	134	45	47	92
48	Male	24	42	120.03	78	108	92	111	151.81	62	75	69	76
49	Male	.	54	106.38	49	79	73	13	133.34	94	55	81	65
35	Male	25.2	23	127.06	59	138	75	140	186.66	64	106	120	89
42	Male	.	23	76.87	74	100	121	76	124.05	56	52	128	36
40	Male	32.79	24	151.83	133	61	43	82	217.83	99	89	61	110
27	Male	26.8	26	120.94	86	120	102	90	134.7	98	116	91	142
37	Male	31.2	27	89.66	77	78	76	103	109.06	51	84	78	29
28	Male	27.4	22	105.92	52	82	94	102	99.84	30	93	104	88
45	Male	24.2	39	83.06	56	142	38	83	112.94	73	97	90	93
32	Male	.	23	140.8	33	142	109	143	199.4	40	116	99	99
46	Male	25	58	121.03	98	98	88	110	140.11	81	102	72	27
44	Male	26.8	22	114.02	21	69	51	100	139.37	40	105	103	68
38	Male	29.3	24	99.6	134	14	39	143	151.77	122	21	24	97
53	Male	24.1	21	96.6	98	114	100	89	112.05	108	89	85	134
54	Male	23.1	23	132.53	122	128	72	105	96.03	66	73	65	90
51	Male	.	24	102.27	114	121	32	127	37.43	118	110	43	105
50	Male	23.4	22	108.55	112	115	110	106	151.05	123	111	115	123
56	Male	26	22	89.74	83	79	70	131	72.82	75	50	69	104
58	Male	20.1	20	122.4	78	61	96	104	107.38	91	90	132	94
23	Male	.	30	129.33	150	150	140	89	113.43	150	140	137	112
55	Male	23.1	21	68.46	75	117	101	125	74.93	103	96	48	94
59	Male	24.5	30	113.8	125	134	139	105	73.16	96	82	94	98
57	Male	21.8	24	149.03	105	150	135	100	97.3	131	44	40	94
52	Male	17.3	22	95.07	131	97	105	73	127.63	97	78	65	55
61	Male	25.7	32	116.28	69	93	104	118	104.24	34	75	75	124
65	Male	26.5	38	65.8	86	99	76	104	105.36	24	93	93	120
77	Male	20.3	24	95.94	97	106	49	96	68.22	108	88	104	78
60	Female	24.7	30	152.05	87	146	121	142	109.08	81	142	136	124
62	Female	22.7	22	128.77	94	100	115	93	106.36	103	86	127	120
63	Female	21.5	21	89.33	104	88	110	111	69.01	65	84	99	75
64	Female	21.7	21	78.03	47	134	120	101	55.55	79	101	137	99
66	Female	27.5	22	105.26	73	96	104	131	87.88	55	71	73	104
68	Female	29.3	22	128.41	80	106	109	99	105.95	85	89	126	114
67	Female	22.1	21	45.32	73	96	104	112	94.03	65	92	95	94
71	Female	20.3	20	104.03	76	43	130	121	82.14	72	28	97	104
76	Female	23	20	108.6	53	31	75	136	116.71	48	47	83	140
73	Female	22.6	21	110.23	59	108	108	123	93.71	43	72	115	106
75	Female	18.1	21	72.19	88	99	76	138	68.45	76	69	78	130
74	Female	24.8	22	96.45	77	89	87	97	121.02	80	74	75	116
72	Female	25.9	22	149.52	117	123	116	74	118.69	96	105	115	94
84	Female	22.5	21	66.94	93	113	124	115	149.74	81	130	133	108
81	Female	26	22	92.43	125	76	136	114	72.22	97	89	75	121
79	Female	26	43	99.78	87	83	107	125	54.94	96	104	121	79
82	Female	23.5	34	87.49	75	119	116	138	111.52	64	116	104	135
83	Female	23.3	20	114.09	81	127	98	123	86.63	92	121	124	116
80	Female	23.9	22	117.03	109	56	40	107	125.37	110	93	115	93
69	Female	20.8	25	40.81	133	150	105	101	57.25	112	135	135	105
70	Female	21.9	22	27.38	89	122	102	104	39.38	45	100	103	113
78	Female	22.2	26	88.47	66	91	118	110	56.83	76	59	72	149
101	Female	21.86	19	132.1	51	86	74	91	149.7	44	62	73	92
102	Female	26.17	20	111.4	70	63	89	99	73.4	76	80	92	100
103	Female	21.83	21	36.6	62	70	72	82	64.1	51	80	67	89
104	Female	28.62	21	32.9	50	50	60	90	40.8	70	50	60	90
105	Female	34.72	20	60.9	97	91	100	79	73	80	96	86	58
106	Female	18.47	18	7	15	100	90	40	3.4	20	90	90	60
107	Female	19.59	20	34.4	40	100	100	91	18.3	67	87	100	90
108	Female	19.91	19	103.5	51	81	83	94	97.8	62	82	81	73
109	Female	21.1	20	75.9	71	85	74	87	107.7	81	67	66	100
